# Supplementary material for: Development of an openEHR Template for COVID-19 Based on Clinical Guidelines
Source: PubMed Central journal article supplement (PMC7288685; doi:10.2196/20239), 2020-06-10

# COVID-19 Pneumonia Diagnosis and Treatment (7th edition)

COMPOSITION ENCOUNTER

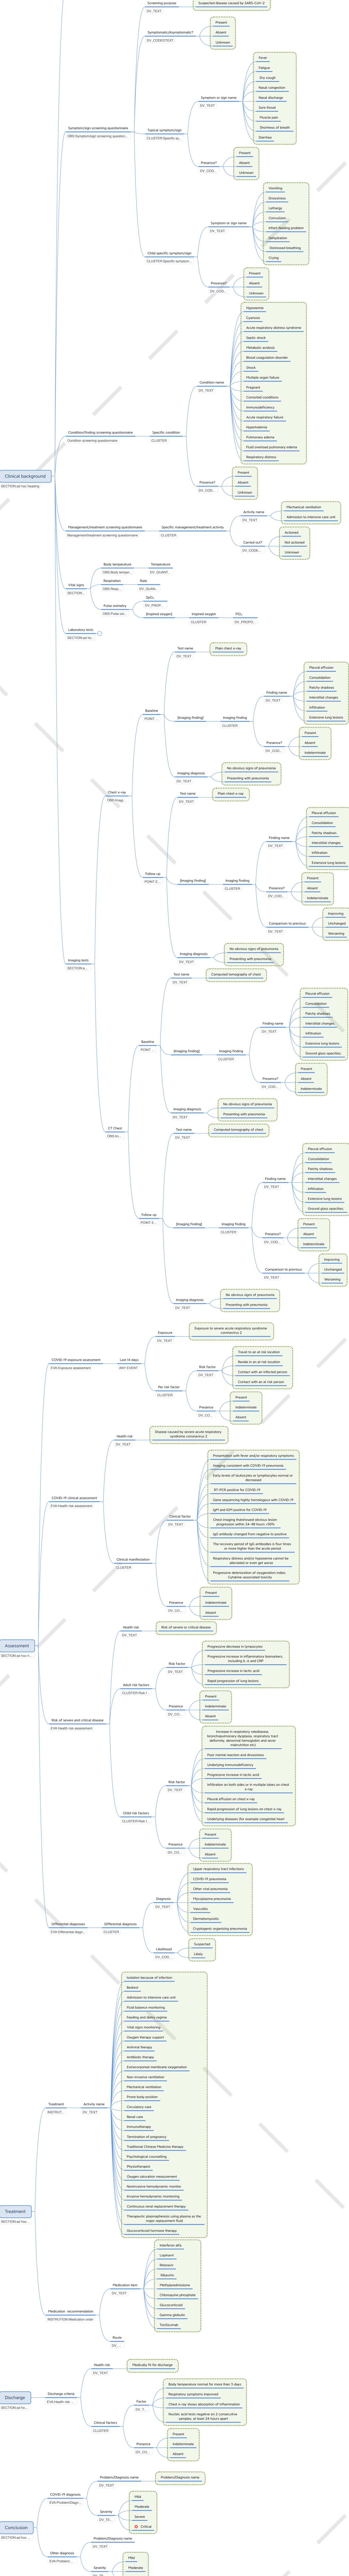

Supplement: jmir_v22i6e20239_app2.pdf [file jmir_v22i6e20239_app2.pdf]
